# Supplementary material for: A sandwich N-doped graphene/Co3O4 hybrid: an efficient catalyst for selective oxidation of olefins and alcohols
Source: Royal Society of Chemistry journal article supplement (doi:10.1039/c3ta11672g), 2013-01-01
Supplement: c3ta11672g.pdf [file c3ta11672g.pdf]

**Supporting Information for**  
**A sandwich N-doped graphene/Co<sub>3</sub>O<sub>4</sub> hybrid: an efficient catalyst for**  
**selective oxidation of olefins and alcohols**

Renfeng Nie<sup>a</sup>, Juanjuan Shi<sup>a</sup>, Weichen Du<sup>a</sup>, Wensheng Ning<sup>b</sup>, Zhaoyin Hou<sup>\*,a</sup>, Feng-Shou Xiao<sup>a</sup>

*a* Institute of Catalysis, Department of Chemistry, Zhejiang University, Hangzhou 310028, China

*b* College of Chemical Engineering and Materials Science, Zhejiang University of Technology, Hangzhou 310014, China

\*Address correspondence to [zyhou@zju.edu.cn](mailto:zyhou@zju.edu.cn)

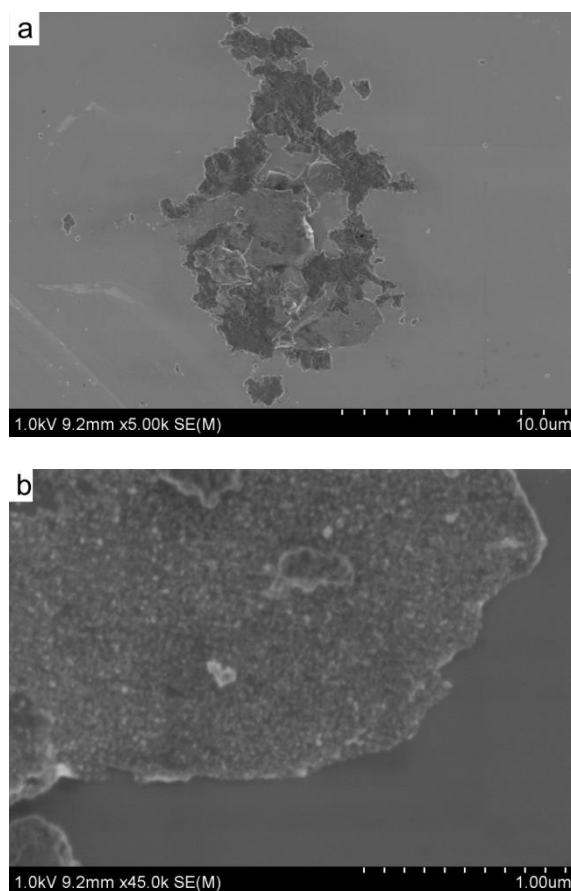

**Figure S1.** SEM images of Co<sub>3</sub>O<sub>4</sub>/RGO-N hybrid

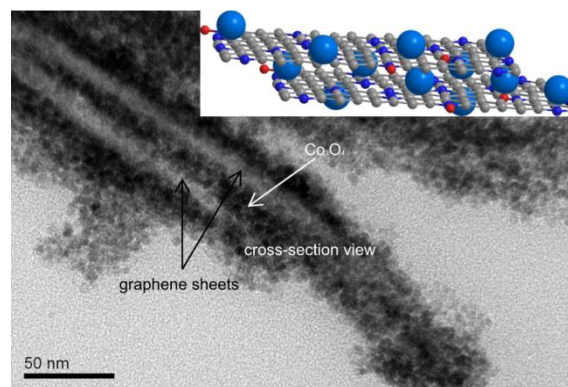

**Figure S2.** Structural illustration of the N-doped graphene- $\text{Co}_3\text{O}_4$  sandwich. TEM image of cross-section view of  $\text{Co}_3\text{O}_4/\text{RGO-N}$  hybrid, the inset is the structural model.

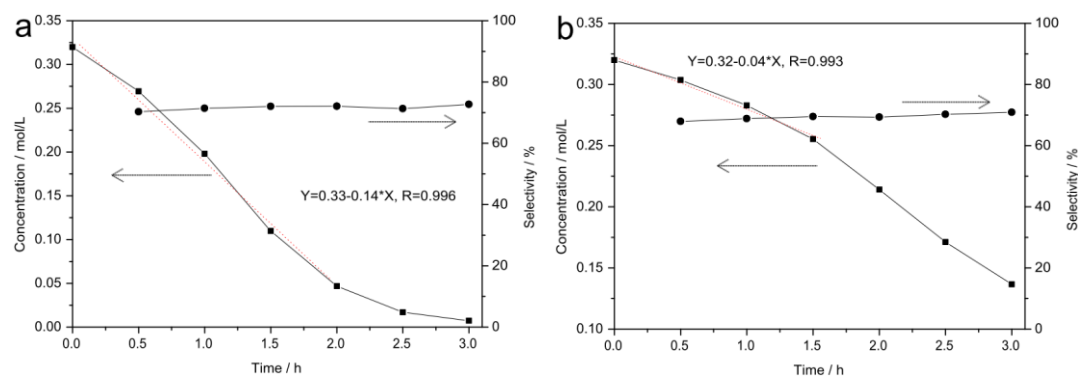

**Figure S3.** Time-course of epoxidation of styrene with  $\text{O}_2$  catalyzed by (a)  $\text{Co}_3\text{O}_4/\text{RGO-N}$  and (b)  $\text{Co}_3\text{O}_4/\text{RGO}$ . Reaction conditions: temperature ( $100\text{ }^\circ\text{C}$ ), the amount of M ( $0.15\text{ mmol}$ ), styrene ( $8\text{ mmol}$ ), DMF ( $25\text{ mL}$ ), flow rate of  $\text{O}_2$  ( $20\text{ mL/min}$ ).

The rate constant of epoxidation reaction could be calculated from the time-concentration courses (these data were added as Fig. S3 in the supporting information). It was concluded that the rate constant of oxidation of styrene over  $\text{Co}_3\text{O}_4/\text{RGO-N}$  ( $0.14\text{ mol/L/h}$ ) is higher than that over  $\text{Co}_3\text{O}_4/\text{RGO}$  ( $0.04\text{ mol/L/h}$ ). These data indicated that styrene is more likely to be activated (lower activation energy) over  $\text{Co}_3\text{O}_4/\text{RGO-N}$  due to the high dispersion of  $\text{Co}_3\text{O}_4$  NPs of  $\text{RGO-N}$  sheets, high abundance of  $\text{Co(III)}$  species derived from the strong interaction between  $\text{Co}_3\text{O}_4$  NPs and  $\text{RGO-N}$ , well dispersion of  $\text{Co}_3\text{O}_4/\text{RGO-N}$  in solvent.
